# Supplementary material
Source: MDPI journal article supplement (https://www.mdpi.com/2077-0472/12/12/2056)
Supplement: s1 [file s1]

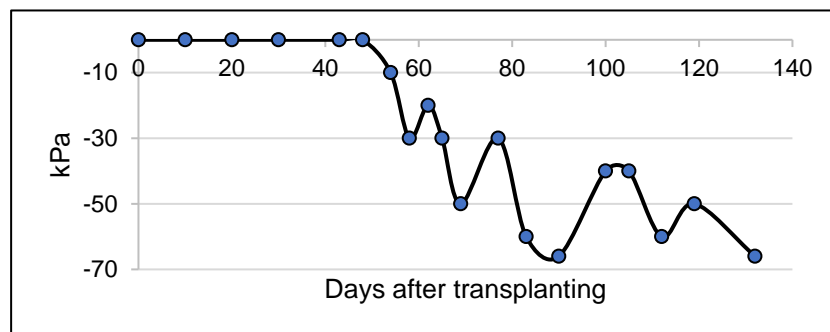

**Figure S1.** Soil tension readings in the P-water experimental field in Hwaseong (2022)

**Table S1.** Reproductive stage response of *Dasan-Pup1*, *Dasanbyeo*, and *indica* controls *IR64-Pup1* and *IR64* grown under rainfed condition in two levels of P fertilization (2022). Means with the same letters are not significantly different using DMRT at P=0.05. Values are means  $\pm$  SE.

| Line       | Treatment      | Days to heading (DAT) | Culm length (cm)  | Productive tiller number | Panicle length (mm) | Hundred Grain weight (g) | Fertility (%)    | Grain yield per plant <sup>1</sup> (g) |
|------------|----------------|-----------------------|-------------------|--------------------------|---------------------|--------------------------|------------------|----------------------------------------|
| Dasan      | P non-supplied | 84                    | 56.50 $\pm$ 1.20  | 4.20 $\pm$ 0.20          | 260.02 $\pm$ 3.51   | 2.70 $\pm$ 0.09          | 90.33 $\pm$ 2.94 | 20.37 $\pm$ 0.80                       |
| Dasan-Pup1 |                | 91                    | 53.20 $\pm$ 0.20  | 3.80 $\pm$ 0.37          | 261.61 $\pm$ 6.72   | 2.79 $\pm$ 0.08          | 95.43 $\pm$ 2.16 | 21.38 $\pm$ 1.90                       |
| IR64       |                | 100                   | 59.10b $\pm$ 0.56 | 11.40a $\pm$ 0.75        | 262.33 $\pm$ 4.55   | 2.64 $\pm$ 0.03          | 86.62 $\pm$ 5.55 | 31.42a $\pm$ 2.11                      |
| IR64-Pup1  |                | 100                   | 63.20a $\pm$ 1.20 | 8.80b $\pm$ 0.80         | 257.67 $\pm$ 1.35   | 2.61 $\pm$ 0.05          | 91.32 $\pm$ 1.92 | 21.18b $\pm$ 1.44                      |
| Dasan      | P supplied     | 82                    | 69.30a $\pm$ 0.86 | 7.00 $\pm$ 0.71          | 251.02 $\pm$ 5.88   | 2.63 $\pm$ 0.07          | 96.86 $\pm$ 1.59 | 28.74 $\pm$ 0.66                       |
| Dasan-Pup1 |                | 82                    | 61.50b $\pm$ 0.32 | 6.20 $\pm$ 0.20          | 245.10 $\pm$ 3.87   | 2.83 $\pm$ 0.05          | 94.01 $\pm$ 1.84 | 28.12 $\pm$ 0.43                       |
| IR64       |                | 101                   | 63.80b $\pm$ 1.66 | 13.60 $\pm$ 2.40         | 253.47 $\pm$ 1.91   | 2.62 $\pm$ 0.02          | 97.74 $\pm$ 5.75 | 28.18 $\pm$ 5.79                       |
| IR64-Pup1  |                | 101                   | 72.00a $\pm$ 0.89 | 13.00 $\pm$ 0.01         | 256.00 $\pm$ 1.72   | 2.72 $\pm$ 0.04          | 96.60 $\pm$ 0.97 | 28.00 $\pm$ 1.54                       |

**Table S2.** Chemical and physical properties of the soil used in the experiment in Hwaseong in 2022.

| Parameter                                         | Before Transplanting |            | Maximum Tillering Stage |            | Maturity Stage |            |
|---------------------------------------------------|----------------------|------------|-------------------------|------------|----------------|------------|
|                                                   | P non-supplied       | P supplied | P non-supplied          | P supplied | P non-supplied | P supplied |
| Total Nitrogen                                    | 0.05                 | 0.04       | 0.05                    | 0.05       | 0.05           | 0.05       |
| Nitrate                                           | 0.01                 | 0.01       | 0.03                    | 0.01       | 0.03           | 0.03       |
| Ammonia                                           | 0.01                 | 0.01       | 0.01                    | 0.01       | 0.01           | 0.01       |
| Total Phosphorus                                  | 0.03                 | 0.03       | 0.03                    | 0.03       | 0.03           | 0.03       |
| Available Phosphorus (mg/kg)                      | 1.20                 | 6.10       | 4.50                    | 8.60       | 0.90           | 3.00       |
| Potassium (me/100g)                               | 0.20                 | 0.19       | 0.19                    | 0.22       | 0.20           | 0.22       |
| CEC(cmol/kg)                                      | 5.16                 | 5.00       | 4.47                    | 5.43       | 5.39           | 5.40       |
| pH[1:5]                                           | 5.28                 | 6.75       | 5.63                    | 6.15       | 6.13           | 6.23       |
| Organic Matter (%)                                | 3.00                 | 2.96       | 3.41                    | 3.98       | 3.25           | 3.25       |
| EC                                                | 0.68                 | 0.67       | 0.99                    | 0.89       | 0.80           | 1.37       |
| Sand (%)                                          | 79.00                | 76.00      | 71.60                   | 63.60      | 69.50          | 71.30      |
| Silt (%)                                          | 11.60                | 14.70      | 15.50                   | 20.20      | 17.90          | 16.60      |
| Clay (%)                                          | 9.40                 | 9.30       | 12.80                   | 16.20      | 12.60          | 12.20      |
| Calcium (me/100g)                                 | 1.99                 | 1.95       | 1.62                    | 2.02       | 2.02           | 2.01       |
| Magnesium (me/100g)                               | 1.24                 | 1.26       | 1.18                    | 1.53       | 1.35           | 1.52       |
| Sodium (me/100g)                                  | 1.22                 | 1.10       | 0.99                    | 1.15       | 1.32           | 1.14       |
| Particle size distribution (%) < 53 $\mu$ m       | 0.24                 | 0.21       | 0.74                    | 0.15       | 0.68           | 0.21       |
| Particle size distribution (%) 53~105 $\mu$ m     | 3.42                 | 3.50       | 3.88                    | 2.07       | 3.21           | 1.11       |
| Particle size distribution (%) 105~250 $\mu$ m    | 13.92                | 12.17      | 9.55                    | 13.35      | 9.99           | 3.95       |
| Particle size distribution (%) 250~500 $\mu$ m    | 10.74                | 8.41       | 7.76                    | 9.77       | 8.57           | 3.64       |
| Particle size distribution (%) 500 $\mu$ m~1.00mm | 25.71                | 24.27      | 26.97                   | 23.58      | 28.08          | 21.40      |
| Particle size distribution (%) 1.00~2.00mm        | 19.85                | 21.62      | 24.01                   | 21.54      | 25.32          | 30.90      |
| Particle size distribution (%) > 2.00mm           | 26.12                | 29.82      | 27.09                   | 29.54      | 24.15          | 38.79      |

**Table S3.** Number of polymorphic markers between *Pup1* donor (DP) parent and the three recipient lines (RP) and the genome recovery rates in the *Pup1* introgression lines

| Line            | Pedigree                                              | BC <sub>2</sub> F <sub>1</sub>                  |                              | BC <sub>2</sub> F <sub>12</sub>                 |                              |
|-----------------|-------------------------------------------------------|-------------------------------------------------|------------------------------|-------------------------------------------------|------------------------------|
|                 |                                                       | Illumina 6K SNP                                 |                              | Axiom 580K SNP (IRGSPv1.0)                      |                              |
|                 |                                                       | Number of polymorphic markers between RP and DP | Genomic similarity to the RP | Number of polymorphic markers between RP and DP | Genomic similarity to the RP |
| MS11-Pup1A      | (MS11*3/IR64- <i>Pup1</i> )-8-24-11-5-2-1-1-1-1-4     | N/A                                             | N/A                          | 208,634                                         | 71.68%                       |
| MS11-Pup1B      | (MS11*3/IR64- <i>Pup1</i> )-17-15-8-3-5-4-1-1-1-1-4   | N/A                                             | N/A                          | 208,634                                         | 66.50%                       |
| TR22183-Pup1    | (TR22183*3/IR64- <i>Pup1</i> )-1-2-24-2-4-1-1-1-1-4   | 2,055                                           | 81.90%                       | 181,124                                         | 99.75%                       |
| Dasanbyeon-Pup1 | (Dasanbyeon*3/IR64- <i>Pup1</i> )-2-6-5-3-3-3-1-1-1-4 | 146                                             | 79.80%                       | 149,078                                         | 92.33%                       |
